# Supplementary material
Source: Royal Society of Chemistry journal article supplement (doi:10.1039/d6mh00223d)
Supplement: d6mh00223d1.pdf [file d6mh00223d1.pdf]

## Supplementary Information

### **A moisture stable high-entropy halide electrolyte with performance recovery capability for all-solid-state batteries**

Jingran Fu,<sup>1,2,3</sup> Hongyang Zhang,<sup>1,2,3</sup> Yuan Tian,<sup>1,2,3</sup> Lue Wang,<sup>1,2,3</sup>

Chunrong Zhao<sup>1,2,3</sup> and Rong Yang<sup>\*1,2,3</sup>

1 National Power Battery Innovation Center, GRINM Group Corporation Limited, Beijing 100088, P.R. China.

2 China Automotive Battery Research Institute Co. Ltd., Beijing 100088, P.R. China.

3 General Research Institute for Nonferrous Metals, Beijing 100088, P.R. China.

This file includes:

Fig S1-4

Table S1-3

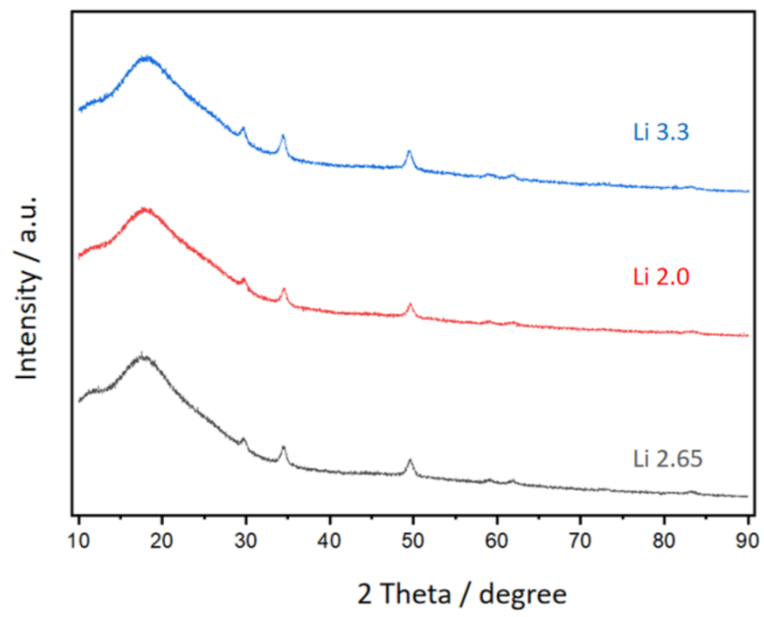

**Fig S1.** XRD patterns of HE-25 with different Li contents.

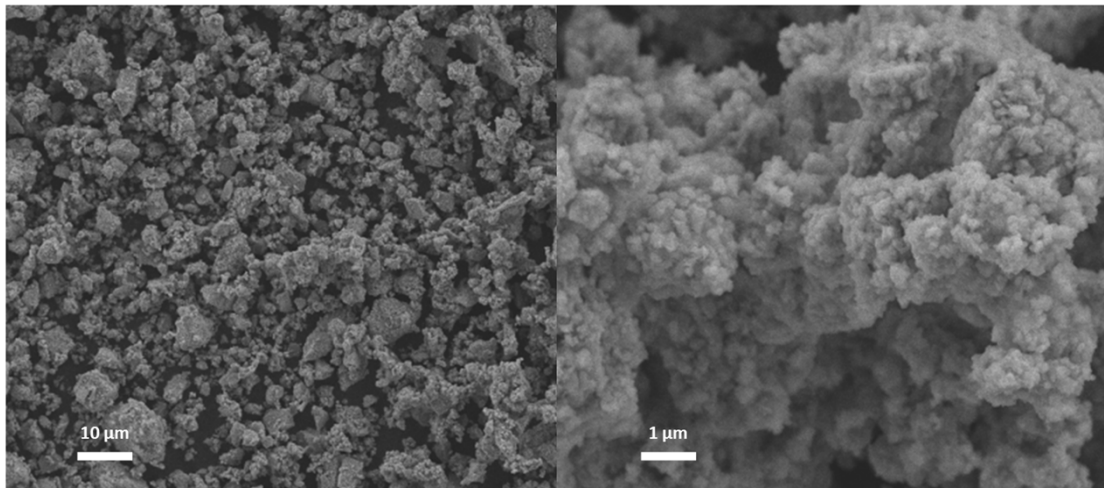

**Fig S2.** SEM result of HE-25.

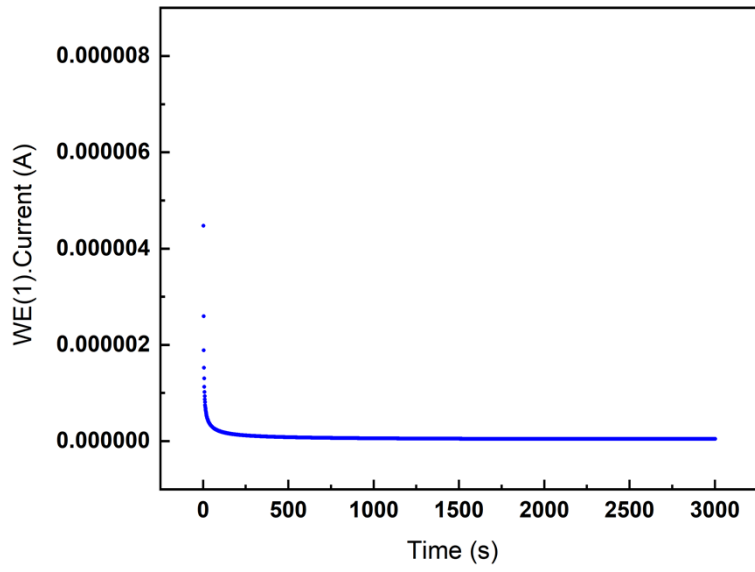

**Fig S3.** DC curve of HE-25.

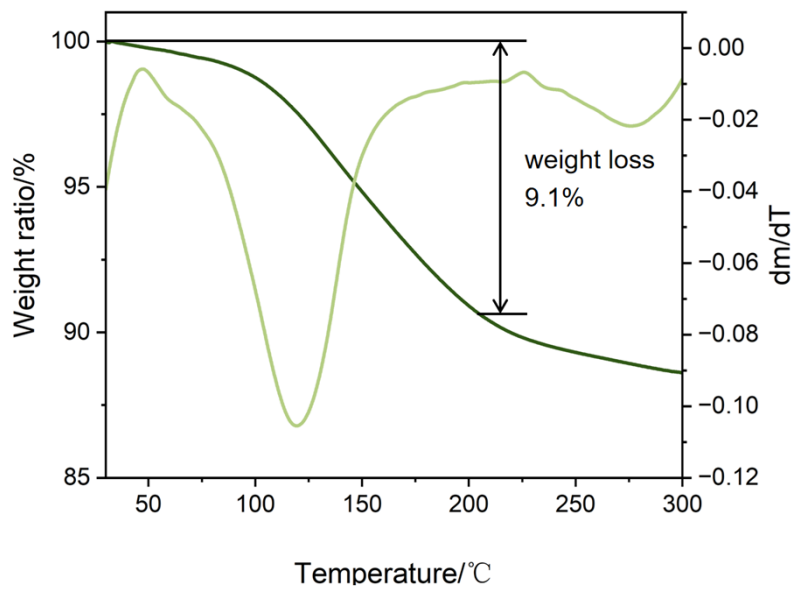

**Fig S4.** TGA result of exposed HE-25.

**Table S1.** The laboratory-scale price of raw materials obtained from the official website of Aladdin.

| Chemical name and description                                            | Stock No.     | Purchase quantity,<br>Q, grams | Total purchase<br>price, RMB | Unit price,<br>RMB/5kg |
|--------------------------------------------------------------------------|---------------|--------------------------------|------------------------------|------------------------|
| Indium(III) chloride, PrimorTrace™,<br>anhydrous, ≥99.99% (metals basis) | I196212-5g    | 5                              | 132.90                       | 132900                 |
|                                                                          | I196212-25g   | 25                             | 427.90                       | 85580                  |
|                                                                          | I196212-100g  | 100                            | 1567.90                      | 78395                  |
|                                                                          | I196212-500g  | 500                            | 5953.90                      | 59539                  |
| Iron(III) chloride, ≥98%                                                 | I141414-100g  | 100                            | 31.90                        | 1595                   |
|                                                                          | I141414-500g  | 500                            | 89.90                        | 899                    |
|                                                                          | I141414-5kg   | 5000                           | 579.90                       | 580                    |
| Zirconium chloride, ≥98%,                                                | Z109459-25g   | 25                             | 49.90                        | 9980                   |
|                                                                          | Z109459-100g  | 100                            | 102.90                       | 5145                   |
|                                                                          | Z109459-500g  | 500                            | 399.90                       | 3999                   |
| Tantalum(V) chloride, ≥95%(T)                                            | T161496-5g    | 5                              | 114.90                       | 114900                 |
|                                                                          | T161496-25g   | 25                             | 417.90                       | 83580                  |
|                                                                          | T161496-100g  | 100                            | 1523.90                      | 76195                  |
| Zinc chloride, ≥95%                                                      | Z293771-500g  | 500                            | 136.90                       | 1369                   |
|                                                                          | Z293771-2.5kg | 2500                           | 419.90                       | 840                    |
| Yttrium(III) chloride, anhydrous,<br>≥99.95% (metals basis), powder      | Y119224-10g   | 10                             | 148.90                       | 74450                  |
|                                                                          | Y119224-50g   | 50                             | 423.90                       | 42390                  |
|                                                                          | Y119224-250g  | 250                            | 1470.90                      | 29418                  |
| Erbium(III) chloride, anhydrous,<br>≥99.9% (metals basis), powder        | E119222-1g    | 1                              | 99.90                        | 499500                 |
|                                                                          | E119222-10g   | 10                             | 469.90                       | 234950                 |
|                                                                          | E119222-50g   | 50                             | 1876.90                      | 187690                 |
|                                                                          | E119222-250g  | 250                            | 8017.90                      | 160358                 |
| Ytterbium(III) chloride, anhydrous,<br>≥99.9% (metals basis), powder     | Y137958-1g    | 1                              | 209.90                       | 1049500                |
|                                                                          | Y137958-5g    | 5                              | 770.90                       | 770900                 |

| Chemical name and description                                              | Stock No.     | Purchase quantity,<br>Q, grams | Total purchase<br>price, RMB | Unit price,<br>RMB/5kg |
|----------------------------------------------------------------------------|---------------|--------------------------------|------------------------------|------------------------|
|                                                                            | Y137958-25g   | 25                             | 3625.90                      | 725180                 |
| Hafnium(IV) chloride, $\geq 98\%$                                          | H431977-10g   | 10                             | 407.90                       | 203950                 |
|                                                                            | H431977-50g   | 50                             | 1425.90                      | 142590                 |
| Scandium(III) chloride, anhydrous,<br>$\geq 99.9\%$ (metals basis), powder | S137955-1g    | 1                              | 1740.90                      | 8704500                |
|                                                                            | S137955-5g    | 5                              | 5634.90                      | 5634900                |
| Lithium chloride, $\geq 98\%$                                              | L573368-100g  | 100                            | 89.90                        | 4495                   |
|                                                                            | L573368-500g  | 500                            | 399.90                       | 3999                   |
|                                                                            | L573368-2.5kg | 2500                           | 1599.90                      | 3200                   |

**Table S2.** Estimated cost of raw materials when purchased in the quantity of 1000 kg.

| Chemical formula  | Intercept [ $\log_{10}(a)$ ] | Slope [b] | Absolute correl. coeff. | Unit price in bulk (1000 kg) purchase, RMB/kg |
|-------------------|------------------------------|-----------|-------------------------|-----------------------------------------------|
| InCl <sub>3</sub> | 4.5129                       | -0.1652   | 0.9727                  | 3326.5                                        |
| FeCl <sub>3</sub> | 2.9853                       | -0.2540   | 0.9841                  | 28.92                                         |
| ZrCl <sub>4</sub> | 3.6842                       | -0.3013   | 0.9563                  | 75.24                                         |
| TaCl <sub>5</sub> | 4.4455                       | -0.1389   | 0.9656                  | 4096.0                                        |
| ZnCl <sub>2</sub> | 3.2563                       | -0.3035   | 1.0000                  | 27.24                                         |
| YCl <sub>3</sub>  | 4.4470                       | -0.2884   | 0.9923                  | 520.6                                         |
| ErCl <sub>3</sub> | 4.9498                       | -0.2054   | 0.9615                  | 5216.0                                        |
| YbCl <sub>3</sub> | 5.3040                       | -0.1147   | 0.9318                  | 41280                                         |
| HfCl <sub>4</sub> | 4.8330                       | -0.2224   | 1.0000                  | 3152.0                                        |
| ScCl <sub>3</sub> | 6.2407                       | -0.2700   | 1.0000                  | 41760                                         |
| LiCl              | 3.1723                       | -0.1055   | 0.9830                  | 346.0                                         |

**Table S3.** Estimated unit price of electrolytes.

| Chemical formula                                                                                                                          | Unit price of precursors in bulk (1000 kg) purchase, RMB/kg |
|-------------------------------------------------------------------------------------------------------------------------------------------|-------------------------------------------------------------|
| Li <sub>2.6</sub> Zr <sub>0.2</sub> Ta <sub>0.2</sub> In <sub>0.2</sub> Zn <sub>0.2</sub> Fe <sub>0.2</sub> Cl <sub>6</sub> (HE-20)       | 1457                                                        |
| Li <sub>2.49</sub> Zr <sub>0.23</sub> Ta <sub>0.23</sub> In <sub>0.23</sub> Zn <sub>0.15</sub> Fe <sub>0.15</sub> Cl <sub>6</sub> (HE-23) | 1627                                                        |
| Li <sub>2.65</sub> Zr <sub>0.25</sub> Ta <sub>0.25</sub> In <sub>0.16</sub> Zn <sub>0.16</sub> Fe <sub>0.16</sub> Cl <sub>6</sub> (HE-25) | 1570                                                        |
| Li <sub>2.8</sub> Zr <sub>0.2</sub> In <sub>0.8</sub> Cl <sub>6</sub>                                                                     | 1850                                                        |
| Li <sub>3</sub> Y <sub>0.2</sub> In <sub>0.8</sub> Cl <sub>6</sub>                                                                        | 1902                                                        |
| Li <sub>3</sub> InCl <sub>6</sub>                                                                                                         | 2238                                                        |
| Li <sub>2.2</sub> In <sub>0.2</sub> Sc <sub>0.2</sub> Zr <sub>0.2</sub> Hf <sub>0.2</sub> Ta <sub>0.2</sub> Cl <sub>6</sub>               | 5547                                                        |
| Li <sub>2.75</sub> Y <sub>0.16</sub> Er <sub>0.16</sub> Yb <sub>0.16</sub> In <sub>0.25</sub> Zr <sub>0.25</sub> Cl <sub>6</sub>          | 6588                                                        |

**Tab S4.** Rietveld refinement result from XRD result of HE-25 after 300°C anneal.

| Li <sub>2.65</sub> Zr <sub>0.25</sub> Ta <sub>0.25</sub> In <sub>0.16</sub> Fe <sub>0.16</sub> Cl <sub>6</sub> Space group: <i>C2/m</i> |         |         |         |           |              |                         |
|-----------------------------------------------------------------------------------------------------------------------------------------|---------|---------|---------|-----------|--------------|-------------------------|
| $a=6.40287 \text{ \AA}$ , $b=10.99658 \text{ \AA}$ , $c=6.31389 \text{ \AA}$ , $\beta=109.73652^\circ$                                  |         |         |         |           |              |                         |
| Atom                                                                                                                                    | x       | y       | z       | Occupancy | Wyckoff site | Uiso ( $\text{\AA}^2$ ) |
| Li 1                                                                                                                                    | 0       | 0.33685 | 0.50000 | 0.883     | 4h           | 0.126                   |
| Li 2                                                                                                                                    | 0.50000 | 0       | 0.50000 | 0.883     | 2d           | 0.275                   |
| Zr 1/Ta 1/                                                                                                                              | 0       | 0       | 0       | 0.875     | 2a           | 0.019                   |

|                                 |         |         |         |       |    |       |
|---------------------------------|---------|---------|---------|-------|----|-------|
| In 1/Zn<br>1/Fe 1               |         |         |         |       |    |       |
| Zr 2/Ta 2/<br>In 2/Zn<br>2/Fe 2 | 0       | 0.30651 | 0       | 0.070 | 4g | 0.042 |
| Cl 1                            | 0.26852 | 0.16338 | 0.23547 | 1     | 8j | 0.031 |
| Cl 2                            | 0.25486 | 0       | 0.75031 | 1     | 4i | 0.030 |
